# Supplementary material for: Recyclable mechanoluminescent luminogen: different polymorphs, different self-assembly effects of the thiophene moiety and recovered molecular packing via simple thermal-treatment
Source: Royal Society of Chemistry journal article supplement (doi:10.1039/c8qm00411k), 2018-09-07
Supplement: c8qm00411k1.pdf [file c8qm00411k1.pdf]

## Supplementary Information for

### **Recyclable Mechanoluminescent Luminogen: Different Polymorphs, Different Self-Assembly Effect of Thiophene Moiety and Recovered Molecular Packing via Simple Thermal-Treatment**

Can Wang<sup>a</sup>, Yun Yu<sup>a</sup>, Zhaofei Chai<sup>a</sup>, Fangdi He<sup>a</sup>, Chaozheng Wu<sup>a</sup>, Yanbin Gong<sup>a</sup>, Mengmeng Han<sup>a</sup>, Qianqian Li<sup>a</sup>, and Zhen Li<sup>\*a,b</sup>

<sup>a</sup> Department of Chemistry, Hubei Key Lab on Organic and Polymeric Opto-Electronic Materials, Wuhan University Wuhan, 430072, China.

E-mail: lizhen@whu.edu.cn, lichemlab@163.com

Fax: +86-27-68755767

<sup>b</sup> Institute of Molecular Aggregation Science, Tianjin University, Tianjin 300072, China

**Keywords :** recyclability, mechanoluminescence, packing mode, self-assembly, thermal-treatment

## Table of Contents

**Scheme S1** The synthetic route of **tPE-5-MeTh**.

**Chart S1.** Different researches using the thiophene derivatives as the self-assembly unit with the ordered packing mode.

**Figure S1.** a) UV-vis spectrum (violet) and PL spectrum (green) of **tPE-5-MeTh** in dilute THF solution. b) PL spectra of **tPE-5-MeTh** in aggregation state (orange). Excitation wavelength: 343 nm (solution) and 376 nm (aggregation). Concentration:  $10^{-5}$  M.

**Table S1.** The culturing in different solvents for the single crystal.

**Figure S2.** PL spectra of **tPE-5-MeTh** in organic solvents with different polarities. Excitation wavelength: 343 nm. Concentration:  $10^{-5}$  M.

**Figure S3.** The intermolecular hydrogen bonds including C-H $\cdots$  $\pi$  (red/violet lines) and C-H $\cdots$ S (green lines) interactions in Crystal-P1 (eight molecules).

**Table S2.** Summarization of the C-H $\cdots$  $\pi$  interactions in Crystal-P1.

**Table S3.** Summarization of the C-H $\cdots$ S interactions in Crystal-P1.

**Figure S4.** The intermolecular hydrogen bonds including C-H $\cdots$  $\pi$  (red/violet lines) and C-H $\cdots$ S (green lines) interactions in Crystal-P2 (eight molecules).

**Table S4.** Summarization of the C-H $\cdots$  $\pi$  interactions in Crystal-P2.

**Table S5.** Summarization of the C-H $\cdots$ S interactions in Crystal-P2.

**Figure S5.** The intermolecular hydrogen bonds including C-H $\cdots$  $\pi$  (red/violet lines) and C-H $\cdots$ S (green lines) interactions in Crystal-P1 (two molecules).

**Figure S6.** The intermolecular hydrogen bonds including C-H $\cdots$  $\pi$  (red/violet lines) and C-H $\cdots$ S (green lines) interactions in Crystal-P2 (two molecules).

**Figure S7.** PXRD patterns of crystalline polymorph in different phases.

**Figure S8.** DSC curves of crystalline polymorph in different phases.

**Figure S9.** Experimental setup for the heating process under the blowing of dry N<sub>2</sub>.

**Figure S10.** PXRD patterns of thermal-treatment in each step for heating temperature over 95 °C.

**Figure S11.** The <sup>1</sup>H NMR spectrum of as prepared tPE-Br.

**Figure S12.** The <sup>13</sup>C NMR spectrum of as prepared tPE-Br.

**Figure S13.** The <sup>1</sup>H NMR spectrum of as prepared tPE-5-MeTh.

**Figure S14.** The <sup>13</sup>C NMR spectrum of as prepared tPE-5-MeTh.

**Table S6.** Structural data crystal of Crystal-P1 and Crystal-P2.

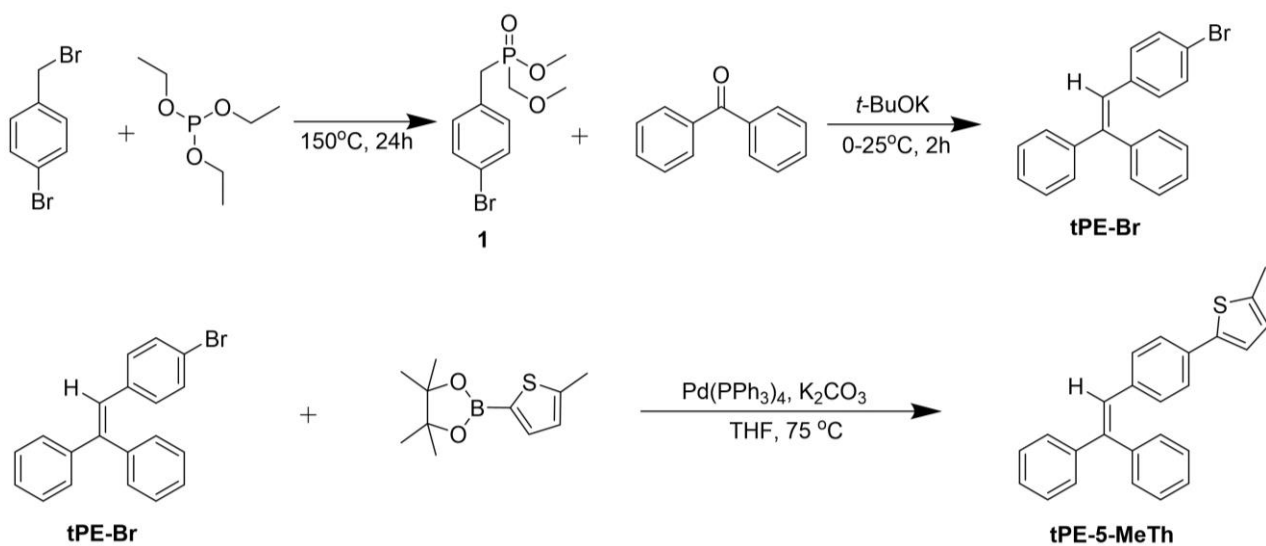

**Scheme S1.** The synthetic route of tPE-5-MeTh.

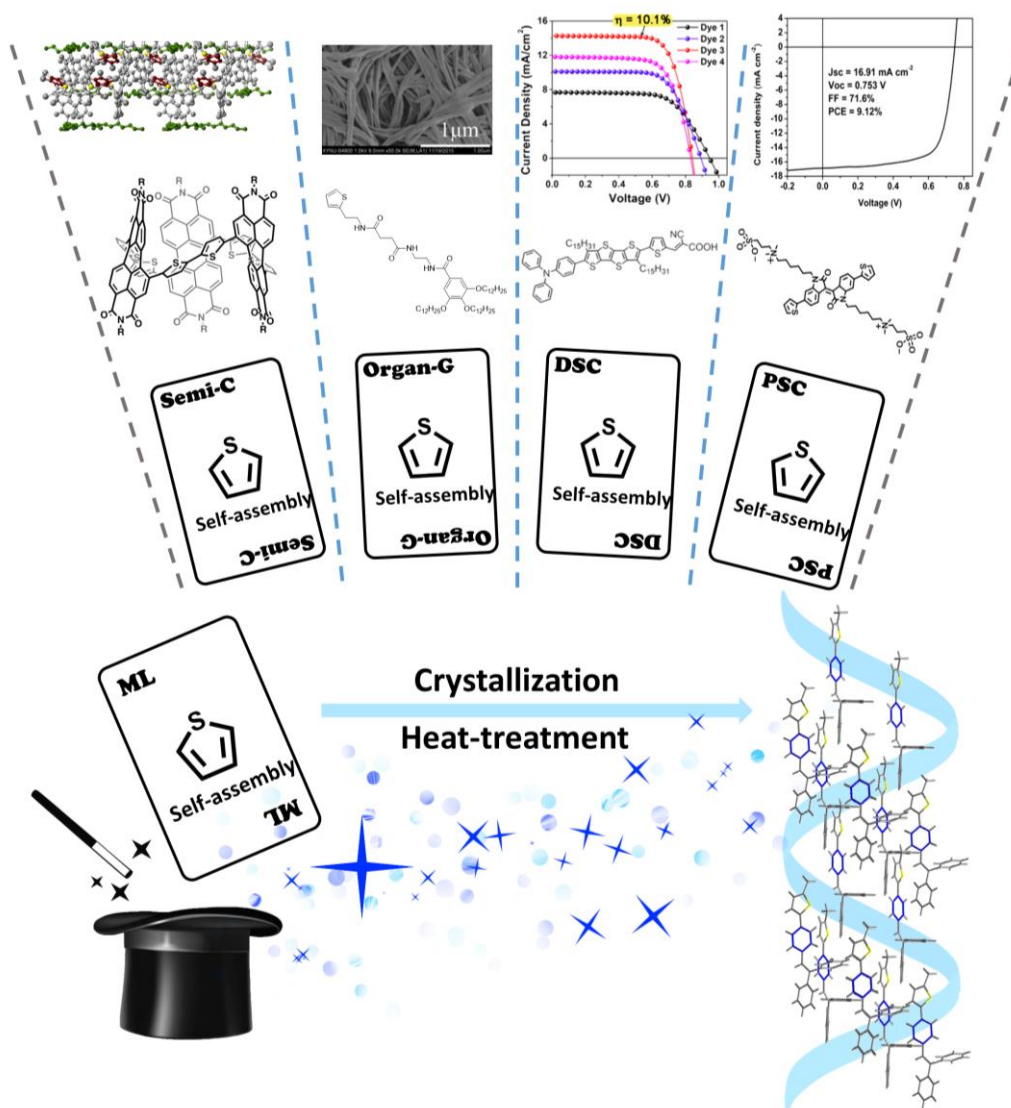

**Chart S1.** Different researches using the thiophene derivatives as the self-assembly unit with the ordered packing mode.

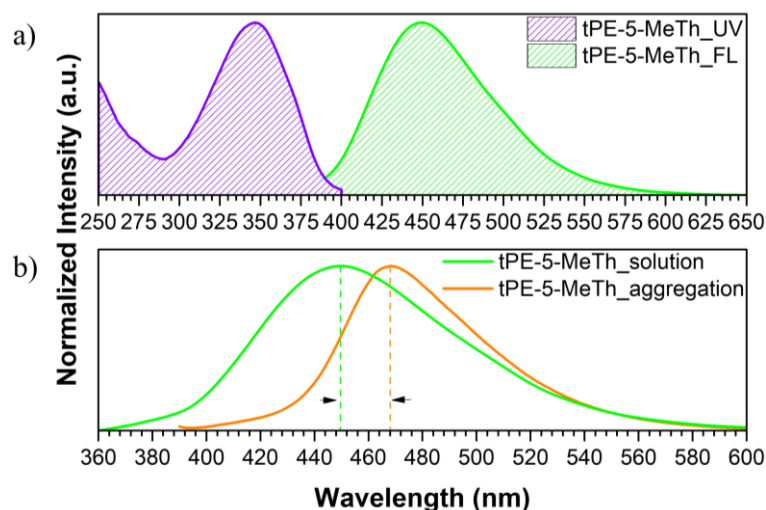

**Figure S1.** a) UV-vis spectrum (violet) and PL spectrum (green) of tPE-5-MeTh in dilute THF solution. b) PL spectra of tPE-5-MeTh in aggregation state (orange). Excitation wavelength: 343 nm (solution) and 376 nm (aggregation). Concentration:  $10^{-5}$  M.

**Table S1.** The culturing in different solvents for the single crystal.

| No. | Content (mg) | solvents                                              | polymorphs    |
|-----|--------------|-------------------------------------------------------|---------------|
| 1   | 50           | Recrystallization in different solvents               | Crystal-P2    |
| 2   | 20           | $\text{CH}_2\text{Cl}_2/\text{CH}_3\text{OH}$ (rt)    | Crystal-P2    |
| 3   | 20           | $\text{CHCl}_3/\text{CH}_3\text{OH}$ (rt)             | Crystal-P1/P2 |
| 4   | 20           | acetone/ $\text{CH}_3\text{OH}$ (rt)                  | Crystal-P1    |
| 5   | 20           | $\text{CH}_2\text{Cl}_2/\text{CH}_3\text{OH}$ (30 °C) | Crystal-P1/P2 |
| 6   | 20           | $\text{CHCl}_3/\text{CH}_3\text{OH}$ (30 °C)          | Crystal-P1    |
| 7   | 20           | acetone/ $\text{CH}_3\text{OH}$ (30 °C)               | Crystal-P1    |

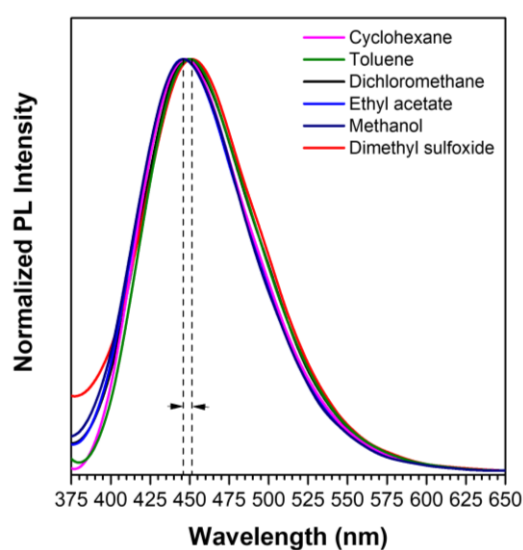

**Figure S2.** PL spectra of tPE-5-MeTh in organic solvents with different polarities. Excitation wavelength: 343 nm. Concentration:  $10^{-5}$  M.

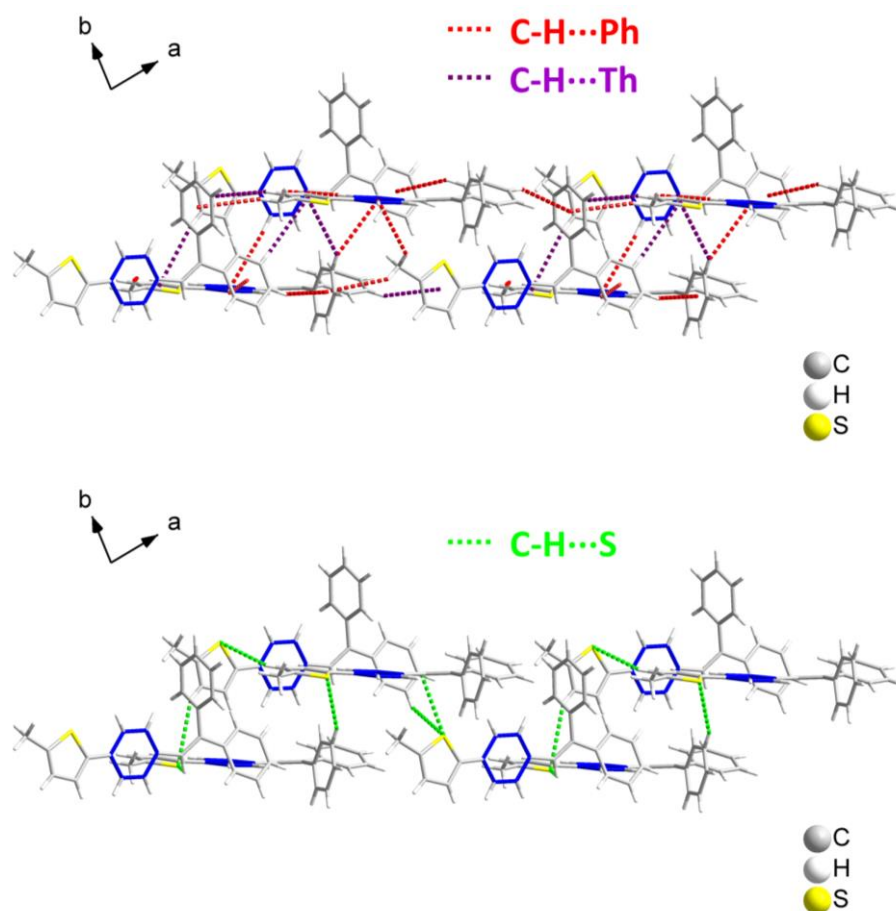

**Figure S3.** The intermolecular hydrogen bonds including C-H... $\pi$  (red/violet lines) and C-H...S (green lines) interactions in Crystal-P1 (eight molecules).

**Table S2.** Summarization of the C-H... $\pi$  interactions in Crystal-P1.

| Type of Interaction         | Orientation of Interaction |                       | d /Å <sup>a</sup> | Number | A /° <sup>b</sup> |
|-----------------------------|----------------------------|-----------------------|-------------------|--------|-------------------|
| Intermolecular <sup>c</sup> | 1                          | C-H...Ph              | 3.097             | 1      | 156.536(520)      |
|                             | 2                          | C-H...Ph              | 3.107             | 1      | 156.896(520)      |
|                             | 3                          | C-H...Ph              | 3.237             | 1      | 176.953(610)      |
|                             | 4                          | C-H...Ph              | 3.248             | 1      | 176.710(610)      |
|                             | 5                          | C-H...Ph              | 3.301             | 1      | 152.205(117)      |
|                             | 6                          | C-H...Ph              | 3.312             | 1      | 127.528(101)      |
|                             | 7                          | C-H...Ph              | 3.372             | 1      | 150.251(964)      |
|                             | 8                          | C-H...Ph              | 3.385             | 1      | 149.886(964)      |
|                             | 9                          | C-H...Ph              | 3.393             | 1      | 143.806(909)      |
|                             | 10                         | C-H...Ph              | 3.398             | 2      | 147.227(741)      |
|                             | 11                         | C-H...Ph              | 3.398             | 1      | 175.070(551)      |
|                             | 12                         | C-H...Ph              | 3.422             | 1      | 174.861(551)      |
|                             | 13                         | C-H...Ph              | 3.458             | 2      | 129.698(737)      |
|                             | 14                         | C-H...Ph              | 3.460             | 1      | 131.991(720)      |
|                             | 15                         | C-H...Ph              | 3.465             | 1      | 138.330(720)      |
|                             | 16                         | C-H...Ph              | 3.524             | 2      | 135.503(688)      |
|                             | 1                          | C-H...Th <sup>d</sup> | 3.251             | 1      | 148.349(995)      |

|   |          |       |   |              |
|---|----------|-------|---|--------------|
| 2 | C-H...Th | 3.277 | 2 | 149.700(736) |
| 3 | C-H...Th | 3.355 | 2 | 139.714(800) |
| 4 | C-H...Th | 3.488 | 2 | 152.073(937) |
| 5 | C-H...Th | 3.541 | 2 | 139.232(711) |

<sup>a</sup> Distance of H...benzene ring. <sup>b</sup> Angel of C-H...benzene/C-H...thiophene ring interaction. <sup>c</sup> Intermolecular hydrogen bond interaction. <sup>d</sup> C-H...thiophene ring interaction.

**Table S3.** Summarization of the C-H...S interactions in Crystal-P1.

| Type of Interaction         | Orientation of Interaction |         | d /Å <sup>a</sup> | Number | A /° <sup>b</sup> |
|-----------------------------|----------------------------|---------|-------------------|--------|-------------------|
| Intermolecular <sup>c</sup> | 1                          | C-H...S | 3.173             | 1      | 131.939(861)      |
|                             | 2                          | C-H...S | 3.413             | 2      | 147.114(737)      |
|                             | 3                          | C-H...S | 3.424             | 1      | 101.336(640)      |
|                             | 4                          | C-H...S | 3.513             | 2      | 151.860(917)      |
|                             | 5                          | C-H...S | 3.525             | 2      | 104.995(522)      |
|                             | 6                          | C-H...S | 3.590             | 2      | 153.440(705)      |

<sup>a</sup> Distance of H...S. <sup>b</sup> Angel of C-H...S interaction. <sup>c</sup> Intermolecular hydrogen bond interaction.

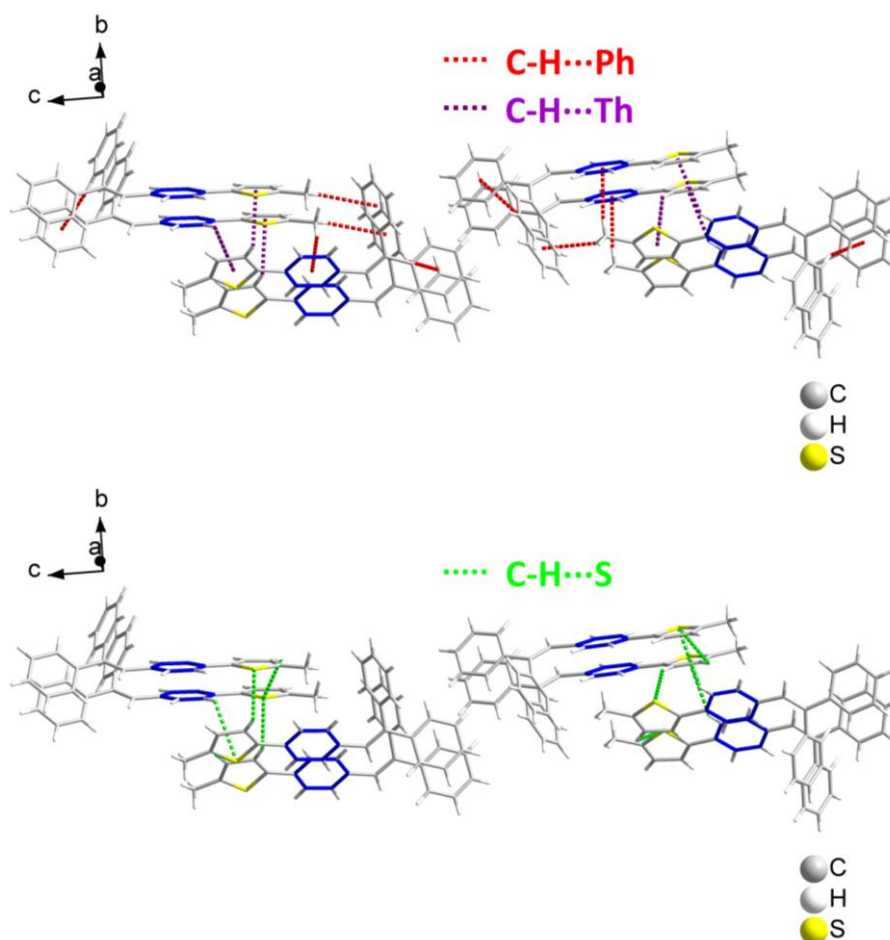

**Figure S4.** The intermolecular hydrogen bonds including C-H... $\pi$  (red/violet lines) and C-H...S (green lines) interactions in Crystal-P2 (eight molecules).

**Table S4.** Summarization of the C-H... $\pi$  interactions in Crystal-P2.

| Type of Interaction         | Orientation of Interaction |                       | d /Å <sup>a</sup> | Number | A /° <sup>b</sup> |
|-----------------------------|----------------------------|-----------------------|-------------------|--------|-------------------|
| Intermolecular <sup>c</sup> | 1                          | C-H...Ph              | 2.911             | 1      | 159.425(615)      |
|                             | 2                          | C-H...Ph              | 2.917             | 2      | 159.304(615)      |
|                             | 3                          | C-H...Ph              | 3.408             | 1      | 144.613(373)      |
|                             | 4                          | C-H...Ph              | 3.421             | 2      | 144.644(373)      |
|                             | 5                          | C-H...Ph              | 3.426             | 1      | 144.792(373)      |
|                             | 6                          | C-H...Ph              | 3.471             | 2      | 152.717(512)      |
|                             | 7                          | C-H...Ph              | 3.487             | 1      | 152.510(512)      |
|                             | 1                          | C-H...Th <sup>d</sup> | 2.985             | 3      | 129.726(256)      |
|                             | 2                          | C-H...Th              | 3.122             | 3      | 137.611(305)      |

<sup>a</sup> Distance of H...benzene ring. <sup>b</sup> Angel of C-H...benzene/C-H...thiophene ring interaction. <sup>c</sup> Intermolecular hydrogen bond interaction. <sup>d</sup> C-H...thiophene ring interaction.

**Table S5.** Summarization of the C-H...S interactions in Crystal-P2.

| Type of Interaction         | Orientation of Interaction |         | d /Å <sup>a</sup> | Number | A /° <sup>b</sup> |
|-----------------------------|----------------------------|---------|-------------------|--------|-------------------|
| Intermolecular <sup>c</sup> | 1                          | C-H...S | 3.089             | 3      | 148.333(252)      |
|                             | 2                          | C-H...S | 3.521             | 4      | 110.647(604)      |
|                             | 3                          | C-H...S | 3.531             | 3      | 117.948(321)      |

<sup>a</sup> Distance of H...S. <sup>b</sup> Angel of C-H...S interaction. <sup>c</sup> Intermolecular hydrogen bond interaction.

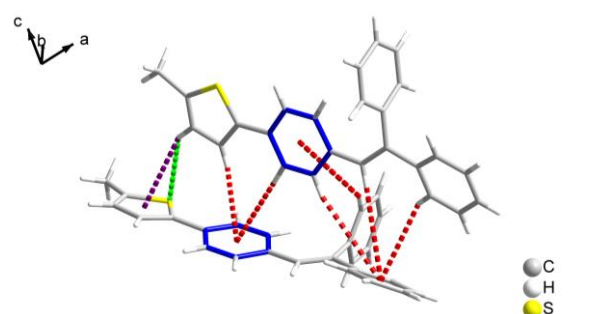**Figure S5.** The intermolecular hydrogen bonds including C-H... $\pi$  (red/violet lines) and C-H...S (green lines) interactions in Crystal-P1 (two molecules).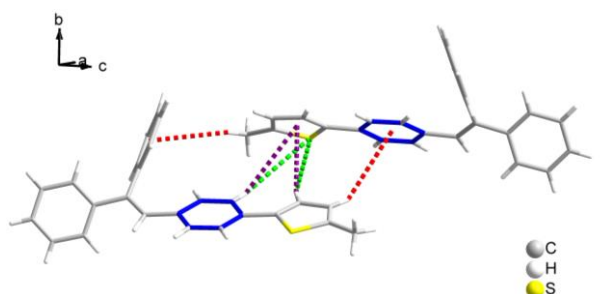**Figure S6.** The intermolecular hydrogen bonds including C-H... $\pi$  (red/violet lines) and C-H...S (green lines) interactions in Crystal-P2 (two molecules).

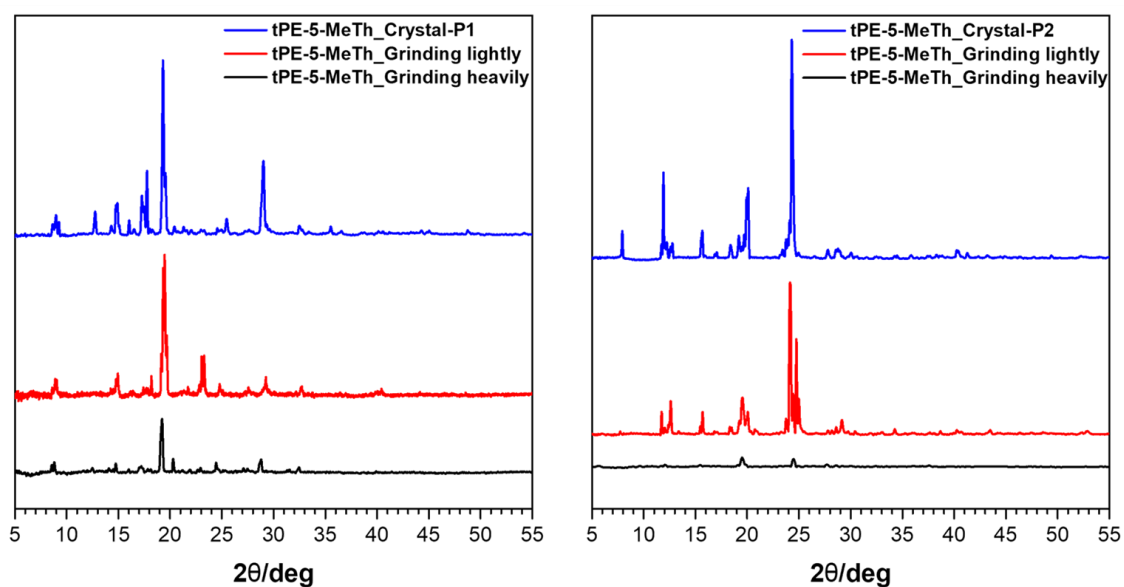

**Figure S7.** PXRD patterns of crystalline polymorph in different phases.

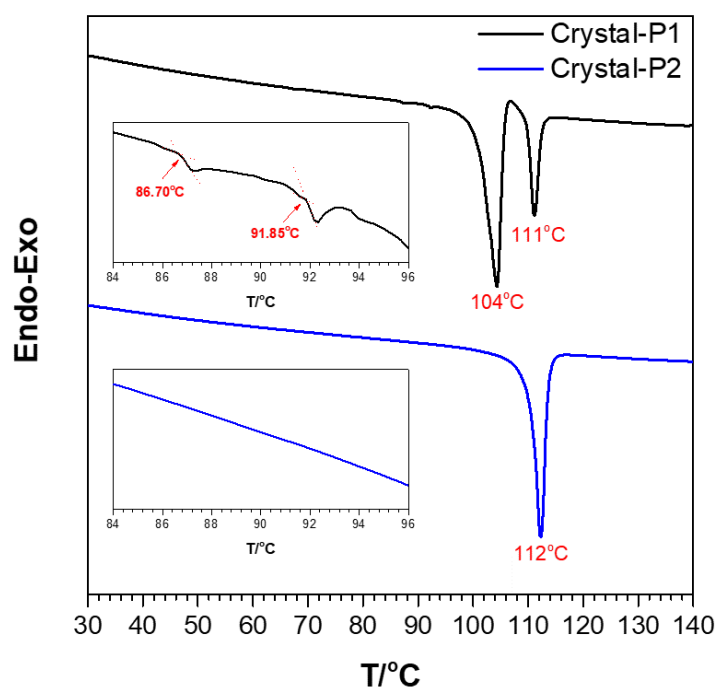

**Figure S8.** DSC curves of crystalline polymorph in different phases.



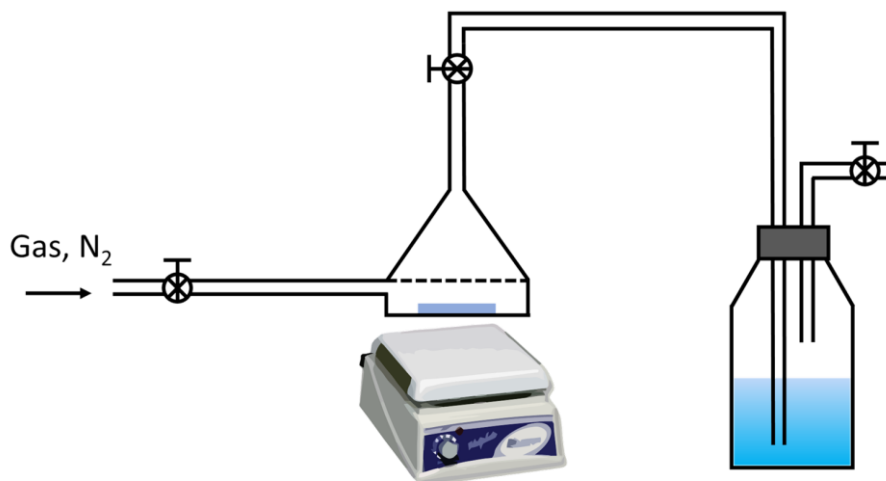

**Figure S9.** Experimental setup for the heating process under the blowing of dry N<sub>2</sub>.

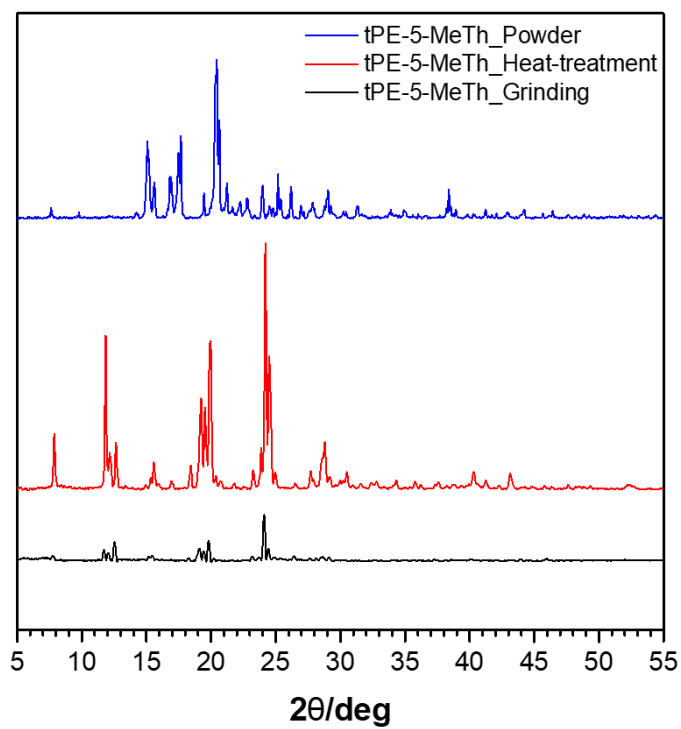

**Figure S10.** PXRD patterns of thermal-treatment in each step for heating temperature over 95 °C.

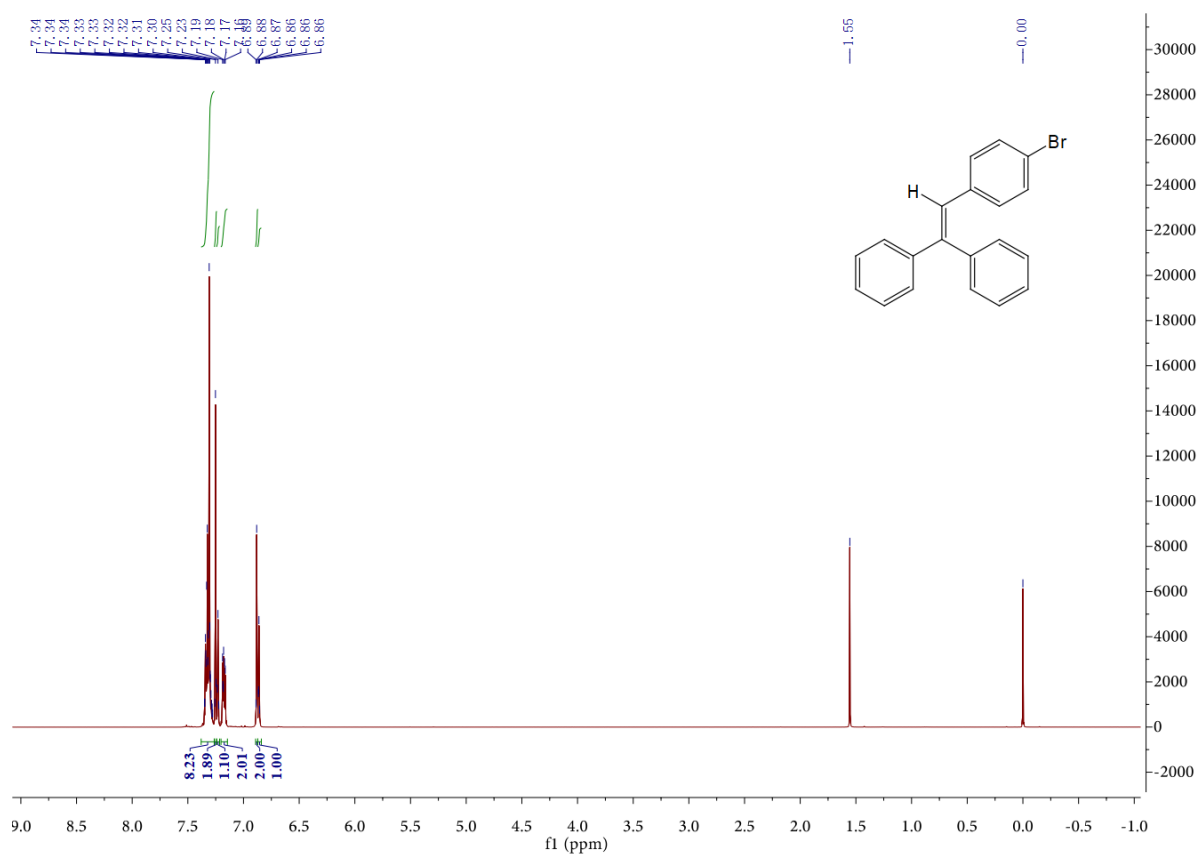

**Figure S11.** The <sup>1</sup>H NMR spectrum of as prepared tPE-Br.

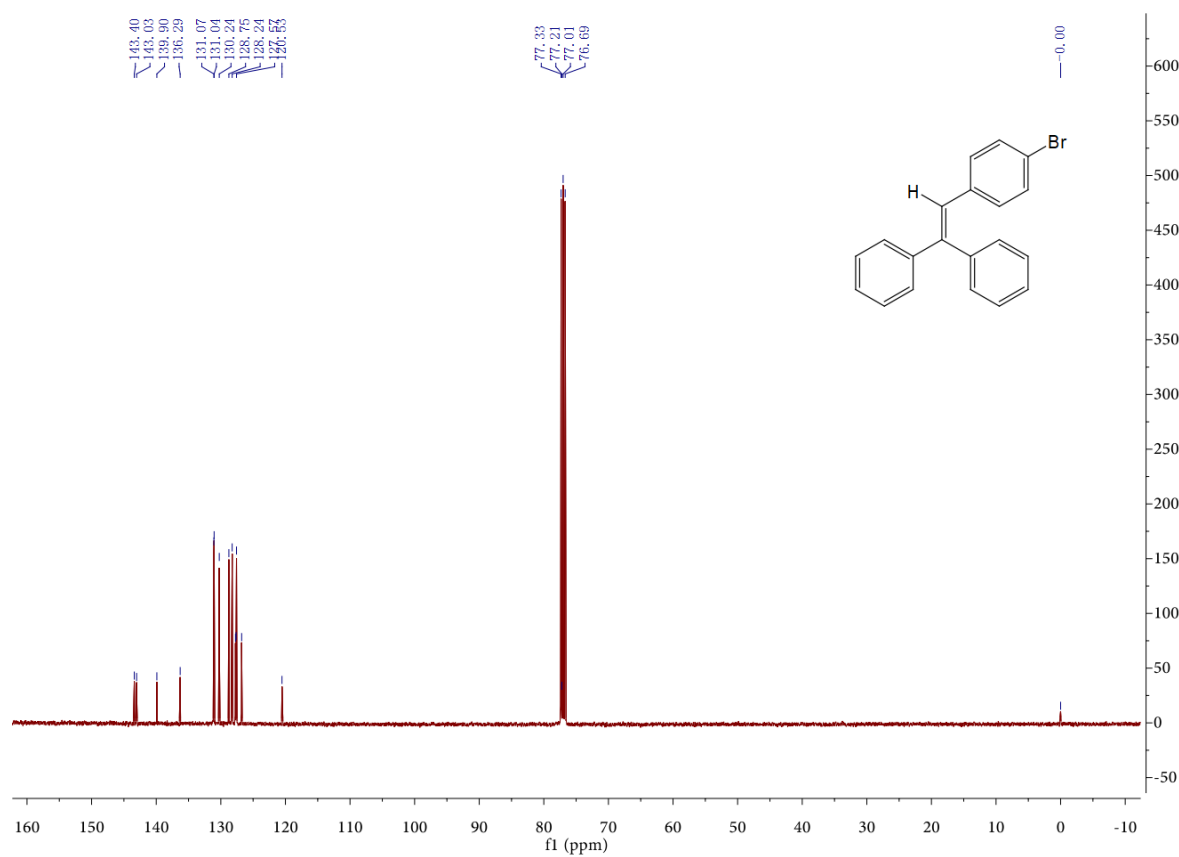

**Figure S12.** The <sup>13</sup>C NMR spectrum of as prepared tPE-Br.

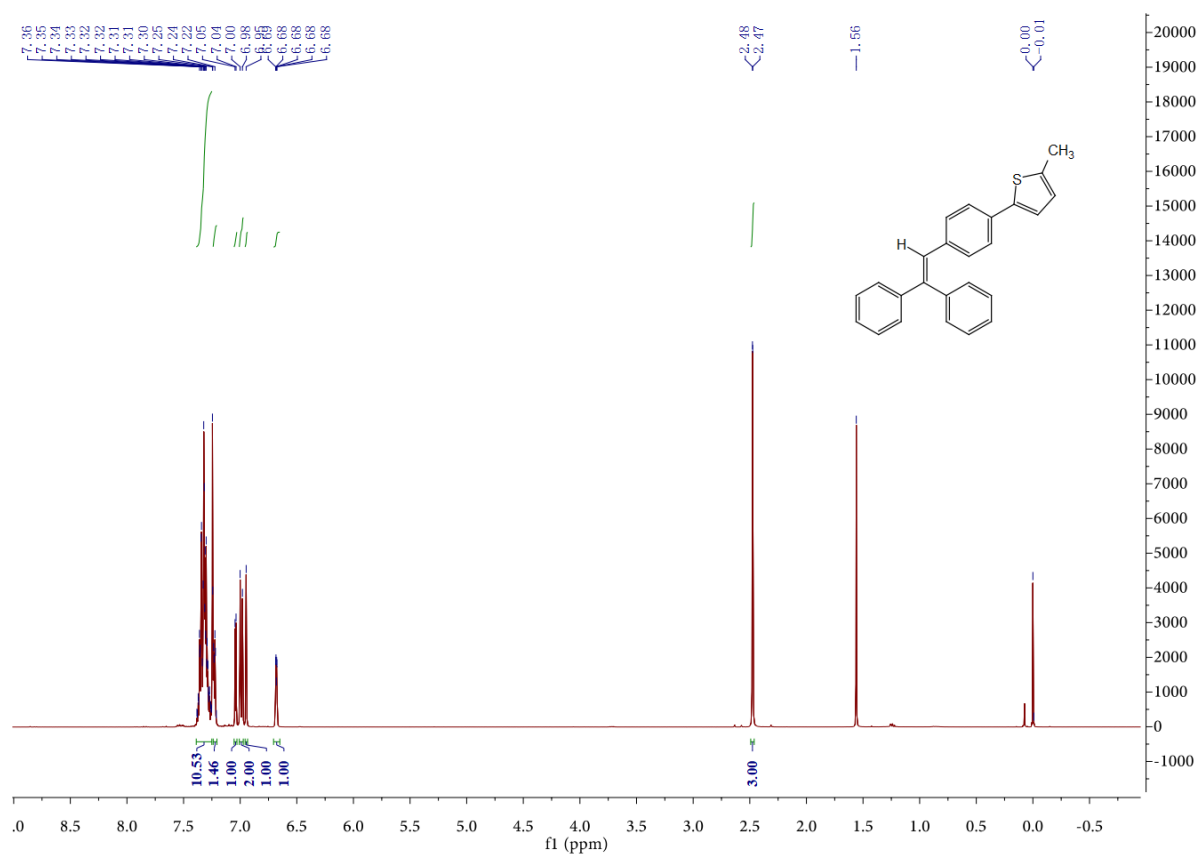

**Table S6.** Structural data crystal of Crystal-P1 and Crystal-P2.

|                                    |                                                                     |                                                    |
|------------------------------------|---------------------------------------------------------------------|----------------------------------------------------|
| Name                               | Crystal-P1                                                          | Crystal-P2                                         |
| Empirical formula                  | C <sub>25</sub> H <sub>20</sub> S                                   | C <sub>25</sub> H <sub>20</sub> S                  |
| Wavelength (Å)                     | 0.71073                                                             | 0.71073                                            |
| Crystal system                     | Triclinic                                                           | Orthorhombic                                       |
| Space group                        | P1                                                                  | P2 <sub>1</sub> 2 <sub>1</sub> 2 <sub>1</sub>      |
| Unit cell Angles (°)               | $\alpha = 64.477(7)$<br>$\beta = 78.704(7)$<br>$\gamma = 77.452(8)$ | $\alpha = 90$<br>$\beta = 90$<br>$\gamma = 90$     |
| Unit cell lengths (Å)              | $a = 8.886(4)$<br>$b = 10.971(5)$<br>$c = 11.261(5)$                | $a = 5.988(3)$<br>$b = 7.360(4)$<br>$c = 45.02(2)$ |
| Unit cell volume (Å <sup>3</sup> ) | 960.5(7)                                                            | 1984.3(17)                                         |
| Z                                  | 2                                                                   | 4                                                  |
| Density (mg/m <sup>3</sup> )       | 1.219                                                               | 1.180                                              |
| F(000)                             | 372                                                                 | 744                                                |
| CCDC number                        | 1846930                                                             | 1846929                                            |

## Reference

1. C. Zheng, Q. Zang, H. Nie, W. Huang, Z. Zhao, A. Qin, R. Hu, B. Z. Tang, *Mater. Chem. Front.*, 2018, **2**, 180-188.
2. X. Ye, Y. Liu, Y. Lv, G. Liu, X. Zheng, Q. Han, K. A. Jackson, X. Tao, *Angew. Chem.*, 2015, **127**, 8087-8091.
